# Supplementary material for: Periderm prevents pathological epithelial adhesions during embryogenesis
Source: JCI journal article supplement (doi:10.1172/jci71946), 2014-08-17
Supplement: sd1 [file 1]

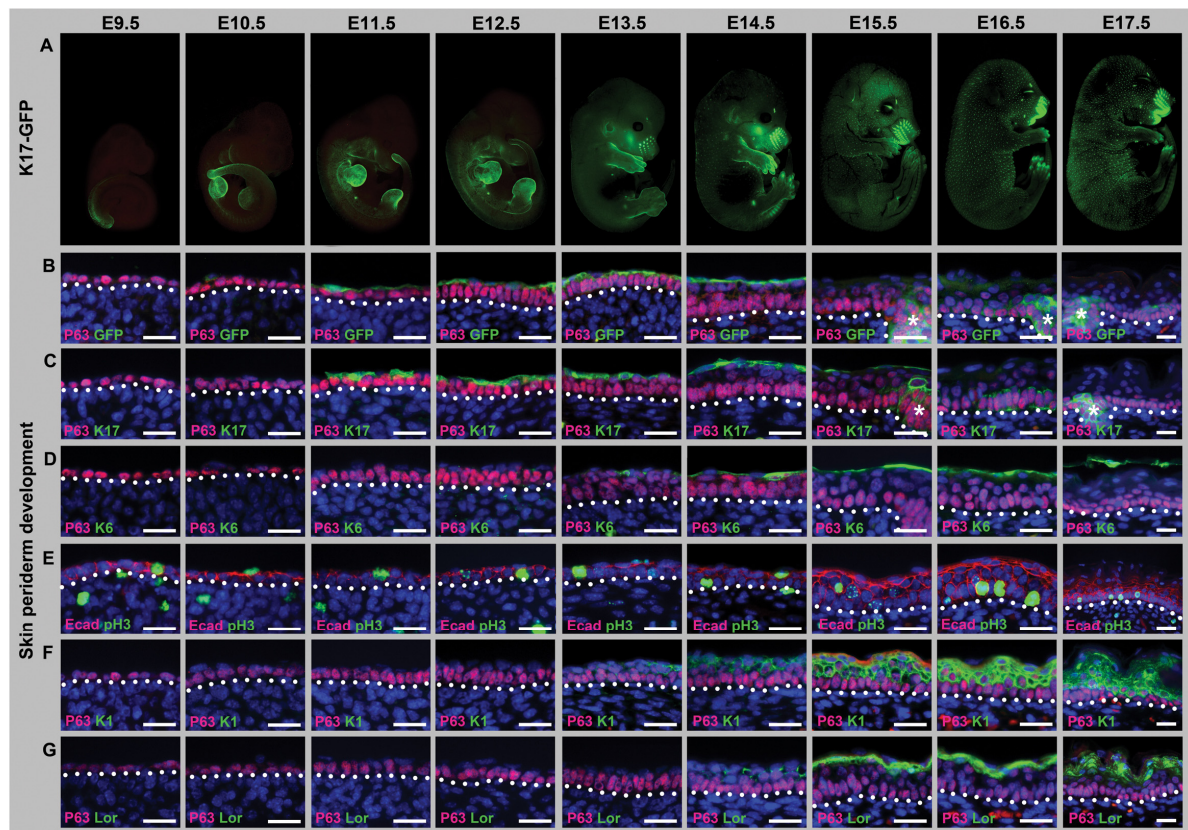

**Supplemental Figure 1.** Epidermal periderm development during embryogenesis. **(A)** Fluorescence visualization of [*mK17 5'*]-GFP transgenic mice reveals that periderm (green) forms in a distinct pattern. Periderm appears over the developing tail at E9.5 and limb buds at E10.5 before spreading in a wave over the trunk and head. Placodes and hair follicles on the trunk become GFP-positive from E14.5 onwards. **(B)** Dual immunofluorescence for p63 (red) and GFP (green) reveal GFP-positive periderm cells above a single layer of p63-positive basal cells from E11.5. As the epidermis differentiates, GFP expression persists until E15.5 when it is down-regulated in periderm and subsequently up-regulated in placodes and hair follicles (asterisked). **(C)** Keratin 17 (green) immunofluorescence faithfully reproduces the GFP expression pattern. **(D)** Keratin 6 (green) is expressed exclusively in periderm from E13.5 onwards and is present in shedding periderm at E17.5. **(E)** Dual immunofluorescence for phospho-histone H3 (green) to label mitotic cells and E-cadherin (red) to highlight cell layers, demonstrates the periderm layer is proliferative from E10.5 - E14.5. **(F and G)** Markers of terminal differentiation, keratin 1 (**F**; green) and loricrin (**G**, green) are expressed in stratifying epithelial layers below the periderm from E13.5 and E14.5, respectively. Dotted lines indicate the position of the basement membrane. Scale bars: 25  $\mu$ m.

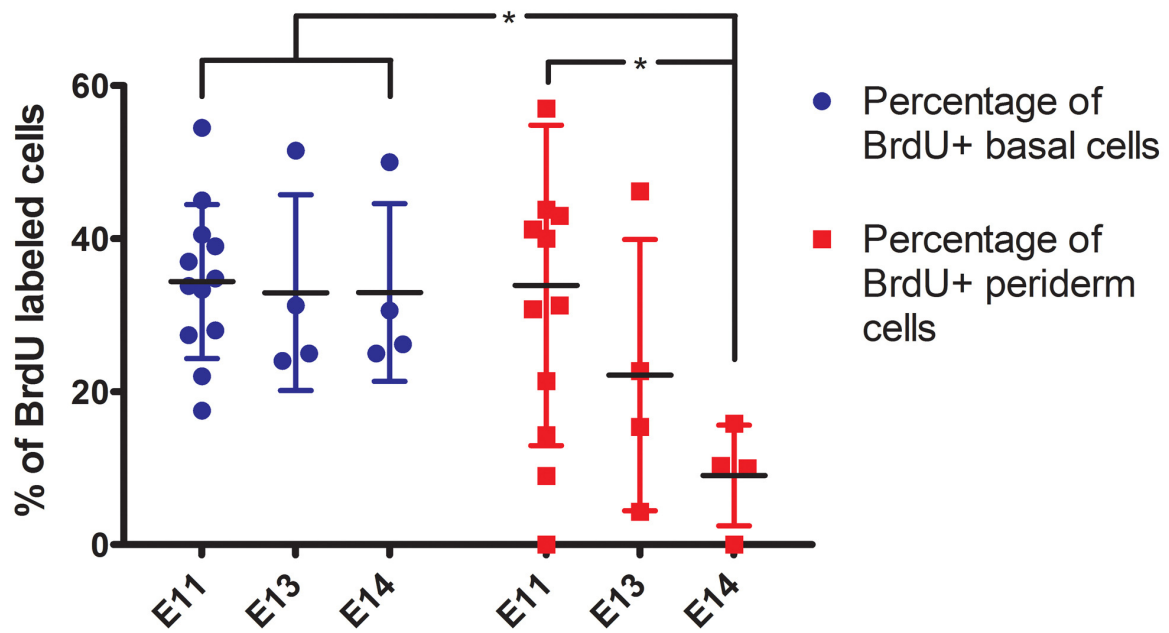

**Supplemental Figure 2.** Quantification of BrdU incorporation during early epidermal development. Dot plot demonstrating the number of BrdU-labelled basal (blue) or periderm (red) cells as a percentage of the total number of cells from each respective layer within a single field of view at the ages indicated. The number of fields of view counted from at least two different mice at each age are: E11: n=12, E13: n=4, E14: n=4. Statistical significance was calculated using a Student's t-test (\* =  $p < 0.05$ ).

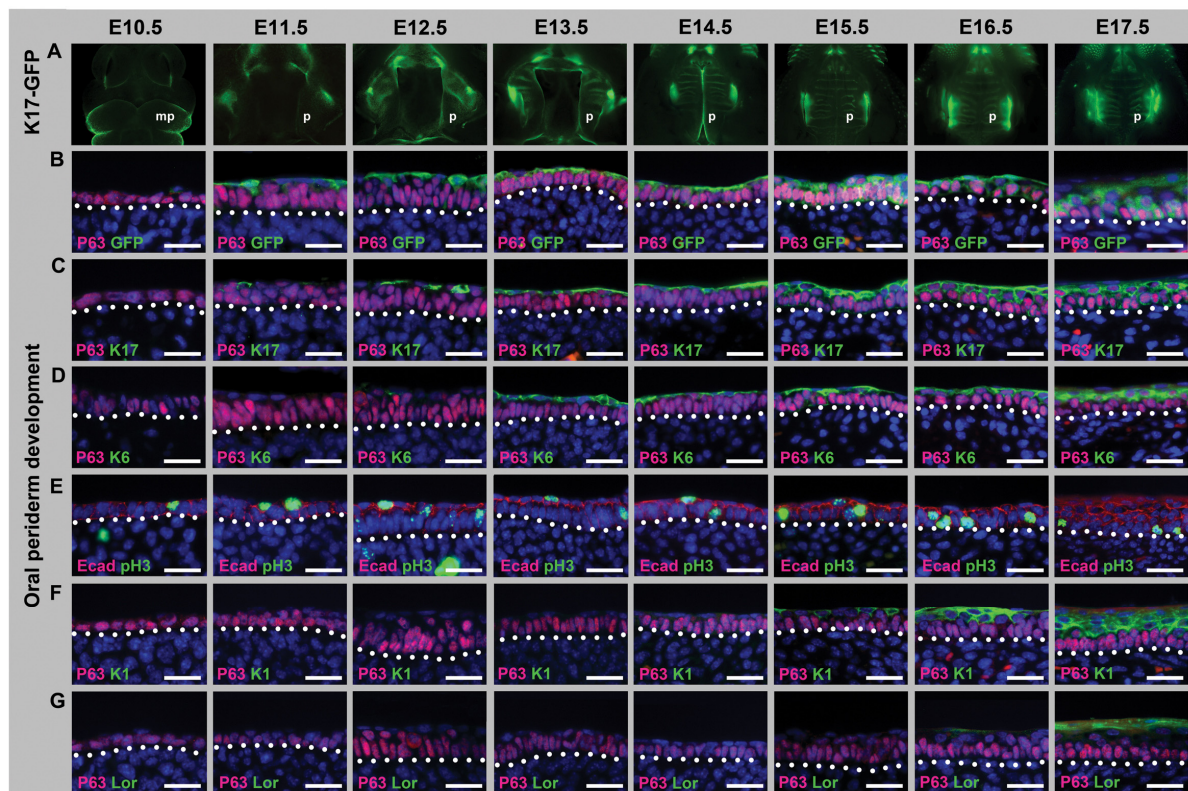

**Supplemental Figure 3.** Oral periderm development during palatogenesis. **(A)** Fluorescence visualization of developing facial processes or palatal shelves of [*mK17 5'*]-GFP transgenic mice reveals that periderm (green) forms in a distinct pattern. Periderm appears over the facial processes at E10.5 and maxillary processes at E11.5 before covering the palatal shelves. Developing tooth-germs and rugae are also GFP-positive from E12.5 onwards. **(B)** Dual immunofluorescence for p63 (red) and GFP (green) reveals GFP-positive periderm cells above a single layer of p63-positive basal cells at E11.5. As palatal epithelium differentiates, GFP expression is expanded to label all cell layers from E15.5 onwards. **(C)** Keratin 17 (green) immunofluorescence faithfully reproduces the GFP expression pattern. **(D)** Keratin 6 (green) is expressed in periderm from E13.5 onwards **(E)** Dual immunofluorescence for phospho-histone H3 (green; to label mitotic cells) and E-cadherin (red; to highlight cell layers) demonstrates the periderm layer is proliferative from E11.5 - E15.5. **(F and G)** Late markers of terminal differentiation, keratin 1 (**F**; green) and loricrin (**G**, green) are expressed in differentiating epithelial layers from E15.5 and E16.5, respectively. Dotted lines indicate the position of the basement membrane. mp, maxillary process; p, palate. Scale bars: 25  $\mu$ m.

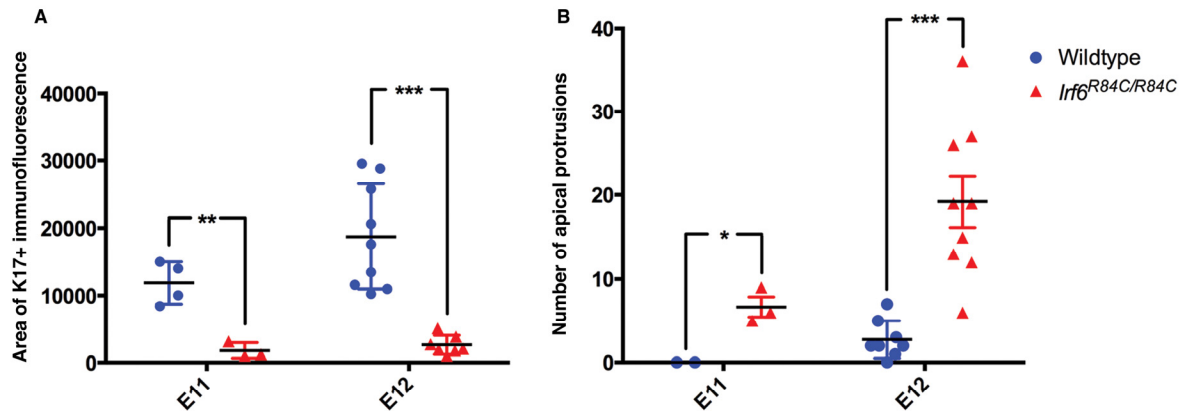

**Supplemental Figure 4.** Quantification of the area of K17 expression and number of apical protrusions in *Lrf6*<sup>R84C/R84C</sup> mice and their wild-type littermates. **(A)** Dot plot showing quantification of the area of K17 immunofluorescence within a single field of view from wild-type (blue) and *Lrf6*<sup>R84C/R84C</sup> (red) embryos at the ages indicated. The area of K17 staining was determined using ImageJ software. Wild-type: E11 – n=4, E12 – n=9; *Lrf6*<sup>R84C/R84C</sup>: E11 – n=2, E12 – n=7. **(B)** Dot plot demonstrating the number of apical protrusions observed in TEM images of wild-type (blue) or *Lrf6*<sup>R84C/R84C</sup> embryos (red) at the ages indicated. Wild-type: E11 – n=2, E12 – n=8; *Lrf6*<sup>R84C/R84C</sup>: E11 – n=3, E12 – n=9. Analysis was performed on images from epidermis and oral epithelia from at least two different mice for each age and genotype. Statistical significance was calculated using a Student's t-test (\* =  $p < 0.05$ ; \*\* =  $p < 0.01$ ; \*\*\* =  $p < 0.001$ ).



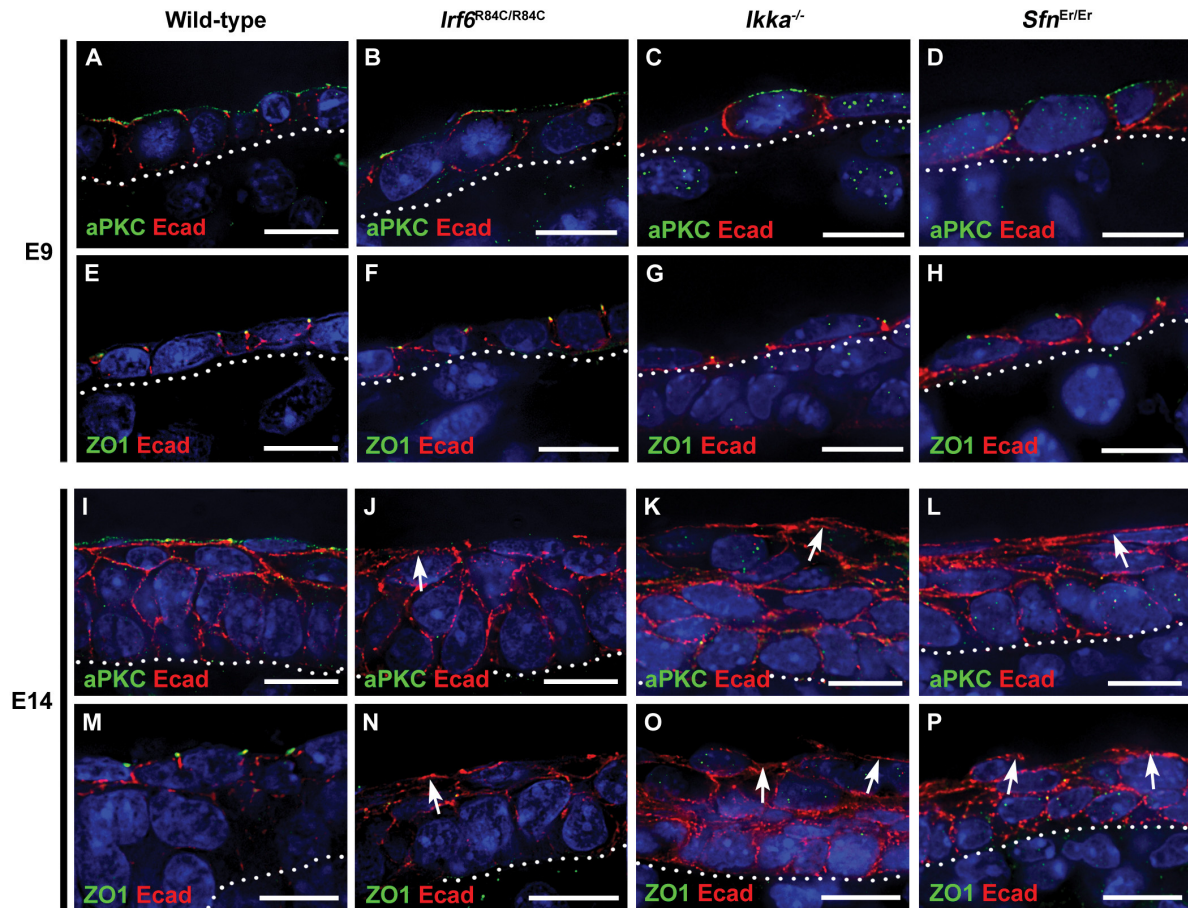

**Supplemental Figure 5.** Failure of periderm formation in *Lrf6*<sup>R84C/R84C</sup>, *Ikka*<sup>-/-</sup> and *Sfn*<sup>Er/Er</sup> mutant mice results in exposed adhesion complexes in developing epidermis. **(A-H)** At E9, prior to periderm formation, basal epithelial cells are highly polarized in wild-type and mutant mice. The polarity marker, atypical protein kinase C (aPKC) **(A-D)**, and the tight junction component, ZO1 **(E-H)**, are expressed apically in membranes and tight junctions of basal cells, respectively, whilst expression of E-cadherin is restricted to the adjacent membranes. **(I-M)** At E14, after periderm formation, expression of aPKC and ZO1 is highly polarized in the periderm of wild-type mice whilst E-cadherin is expressed in basal and intermediate cells but absent from the apical surface of periderm cells **(I and M)**. However, in *Lrf6*<sup>R84C/R84C</sup>, *Ikka*<sup>-/-</sup> and *Sfn*<sup>Er/Er</sup> mutant mice where periderm formation is disrupted expression of aPKC and ZO1 are absent and E-cadherin is expressed on the apical membrane of exposed intermediate cells **(J-L and N-P)**. Scale bars: 50 μm.

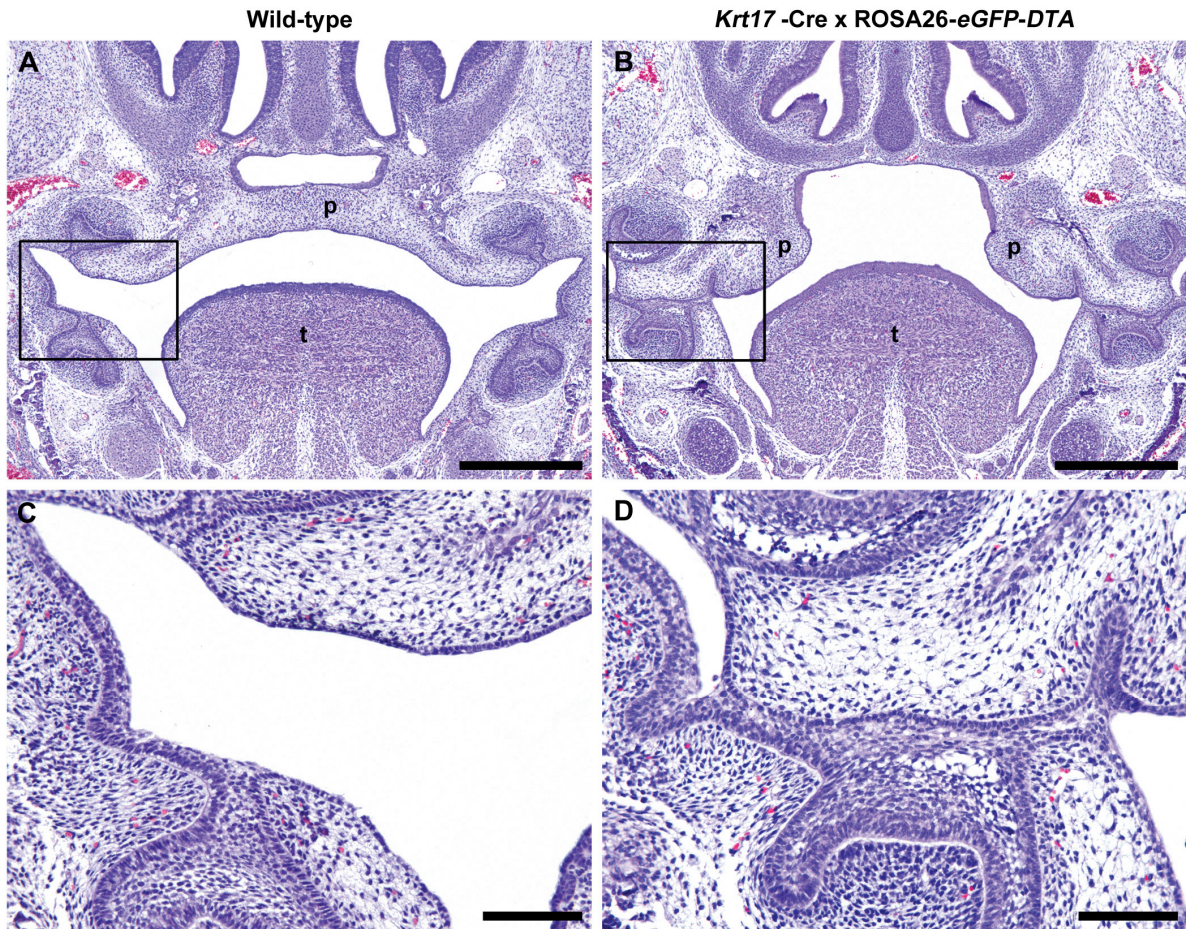

**Supplemental Figure 6.** Intra-oral epithelial adhesions following periderm ablation result in cleft palate in severe cases. **(A)** In E16 wild-type mice, in which the periderm forms normally, the palatal shelves have elevated above the tongue and fused in the midline. **(B)** In contrast, in *Krt17*-Cre x *ROSA26-eGFP-DTA* bi-transgenic mice, in which a subset of periderm cells are killed, inter-epithelial adhesions have formed between the maxillary and mandibular processes which have prevented complete elevation of the palatal shelves resulting in cleft palate. **(C and D)** Higher magnification images of the areas boxed in **A** and **B**, respectively, illustrate the inter-epithelial adhesions observed in *Krt17*-Cre x *ROSA26-eGFP-DTA* bi-transgenic mice. p, palatal shelf; t, tongue. Scale bars: **A** and **B**, 500  $\mu$ m; **C** and **D**, 100  $\mu$ m.



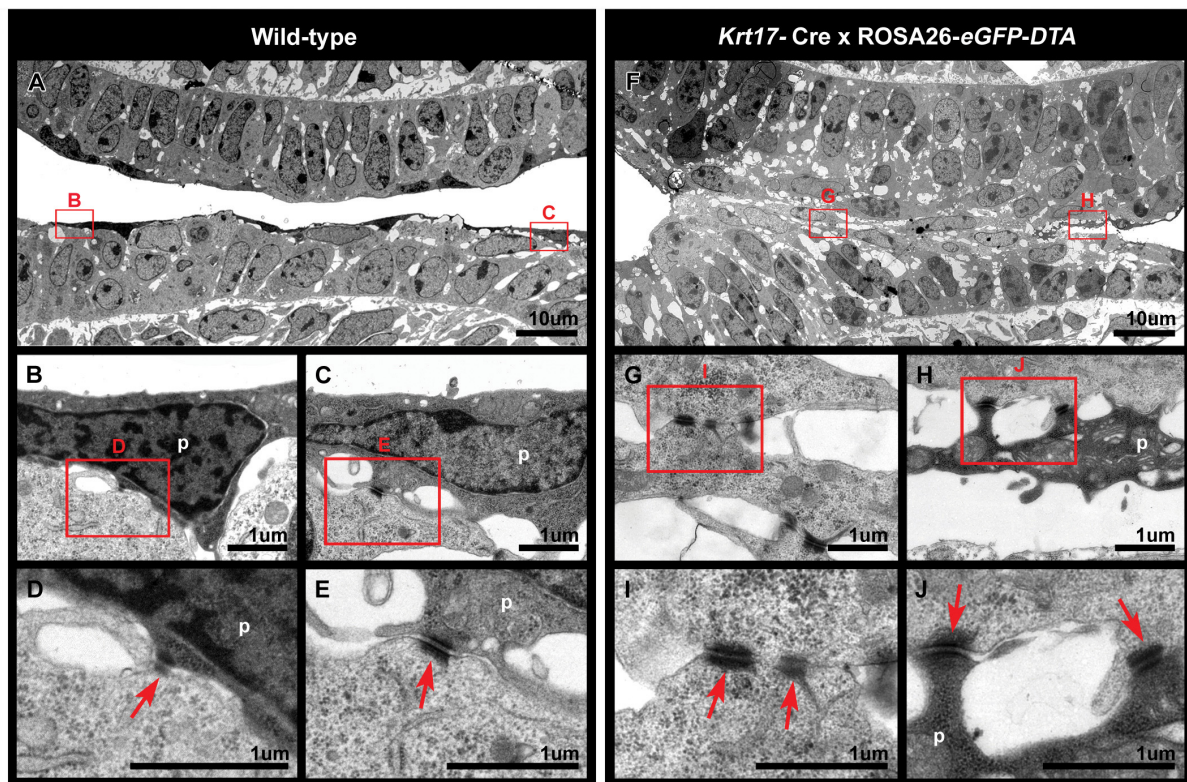

**Supplemental Figure 7.** *Krt17-Cre* x *ROSA26-eGFP-DTA* bi-transgenic mice lack electron-dense periderm within intra-oral fusions. (**A-E**) The oral epithelia of E13 wild-type mice are covered by a layer of electron-dense, flattened periderm cells (**A**). Within the periderm, desmosomes (arrows in **D** and **E**) are confined to the basal and lateral surfaces. (**F-J**) In *Krt17-Cre* x *ROSA26-eGFP-DTA* bi-transgenic mice, intra-oral adhesions have formed (**F**). In regions of inter-epithelial adhesions, the electron-dense periderm cells are absent and desmosomes form between the juxtaposed maxillary and mandibular epithelia (arrows in **I**). Where periderm cells have not been ablated, desmosomes do not form between the maxillary and mandibular epithelia and inter-epithelial adhesions are prevented. In these regions, desmosomes are confined to the basolateral surfaces of the periderm cells (arrows in **J**). p, periderm.
